# Supplementary material
Source: publisher figshare collection journal article supplement (https://frontiersin.figshare.com/ndownloader/files/31390846)
Supplement: Supplementary file 1 [file 31390846]

## Sheet: Sheet1
Table S3 Results of Shapiro-Wilk normality test
	Data Set	W Score	p-value
π	VH	0.18689	< 2.2e-16
	DA	0.1436	< 2.2e-16
	SCBG	0.18663	< 2.2e-16
	DA_island	0.9225	0.01684
	DA_background	0.14415	< 2.2e-16
	Mainland_island	0.81111	3.395e-05
	Mainland_background	0.18252	< 2.2e-16
Tajima's D	VH	0.85453	< 2.2e-16
	DA	0.99054	2.27e-13
	SCBG	0.64235	< 2.2e-16
	DA_island	0.97529	0.6035
	DA_background	0.99012	1.233e-13
	Mainland_island	0.92747	0.02353
	Mainland_background	0.89313	< 2.2e-16
Fst	VH/DA	0.93186	< 2.2e-16
	VH/SCBG	0.65421	< 2.2e-16
	DA/SCBG	0.95083	< 2.2e-16
